# Supplementary material for: The Secreted Protein C10orf118 Is a New Regulator of Hyaluronan Synthesis Involved in Tumour-Stroma Cross-Talk
Source: MDPI journal article supplement (doi:10.3390/cancers13051105), 2021-03-05
Supplement: s1 [file s1]

## Article

# The Secreted Protein C10orf118 Is a New Regulator of Hyaluronan Synthesis Involved in Tumour-Stroma Cross-Talk

Ilaria Caon <sup>1,†</sup>, Maria Luisa D'Angelo <sup>1,†</sup>, Barbara Bartolini <sup>1,†</sup>, Elena Caravà <sup>1</sup>, Arianna Parnigoni <sup>1</sup>, Flavia Contino <sup>2</sup>, Patrizia Cancemi <sup>2,3</sup>, Paola Moretto <sup>1</sup>, Nikos K. Karamanos <sup>4</sup>, Alberto Passi <sup>1</sup>, Davide Vigetti <sup>1</sup>, Evgenia Karousou <sup>1,\*</sup> and Manuela Viola <sup>1</sup>

- <sup>1</sup> Department of Medicine and Surgery, University of Insubria, Via J.H. Dunant 5, 21100 Varese, Italy; i.caon@uninsubria.it (I.C.); marialuisadangelo@gmail.com (M.L.D.); bartolini.barbara@gmail.com (B.B.); e.carava@uninsubria.it (E.C.); a.parnigoni@uninsubria.it (A.P.); paola.moretto@uninsubria.it (P.M.); alberto.passi@uninsubria.it (A.P.); Davide.Vigetti@uninsubria.it (D.V.); manuela.viola@uninsubria.it (M.V.)
- <sup>2</sup> Department of Biological Chemical and Pharmaceutical Sciences and Technologies (STEBICEF), University of Palermo, 90128 Palermo, Italy; flavia.contino@unipa.it (F.C.); patrizia.cancemi@unipa.it (P.C.)
- <sup>3</sup> Centro di Oncobiologia Sperimentale (C.O.B.S.), Oncology Department, La Maddalena, 90146 Palermo, Italy
- <sup>4</sup> Biochemical Analysis and Matrix Pathobiology Research Group, Laboratory of Biochemistry, Department of Chemistry, University of Patras, 26110 Patras, Greece; n.k.karamanos@upatras.gr
- \* Correspondence: jenny.karousou@uninsubria.it
- † These authors contributed equally to this work.

**Citation:** Caon, I.; D'Angelo, M.L.; Bartolini, B.; Caravà, E.; Parnigoni, A.; Contino, F.; Cancemi, P.; Moretto, P.; Karamanos, N.K.; Passi, A.; et al. The Secreted Protein C10orf118 Is a New Regulator of Hyaluronan Synthesis Involved in Tumour-Stroma Cross-Talk.

*Cancers* **2021**, *13*, 1105.  
<https://doi.org/10.3390/cancers13051105>

Academic Editor: Derek Radisky and Hamid Morjani

Received: 30 January 2021  
 Accepted: 26 February 2021  
 Published: 5 March 2021

**Publisher's Note:** MDPI stays neutral with regard to jurisdictional claims in published maps and institutional affiliations.

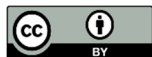

**Copyright:** © 2021 by the authors. Licensee MDPI, Basel, Switzerland. This article is an open access article distributed under the terms and conditions of the Creative Commons Attribution (CC BY) license (<http://creativecommons.org/licenses/by/4.0/>).

## Supplementary

A

### {MATRIX} Mascot Search Results

#### Protein View

Match to: Q7Z3E2|CJ118\_HUMAN Score: 36 Expect: 4.5  
 Uncharacterized protein C10orf118 - Homo sapiens (Human)

Nominal mass (M<sub>r</sub>): **104307**; Calculated pI value: 5.94  
 NCBI BLAST search of Q7Z3E2|CJ118\_HUMAN against nr  
 Unformatted [sequence string](#) for pasting into other applications

Taxonomy: [Homo sapiens](#)

Fixed modifications: Carbamidomethyl (C)  
 Variable modifications: Oxidation (M)  
 Cleavage by Trypsin: cuts C-term side of KR unless next residue is P  
 Number of mass values searched: 17  
 Number of mass values matched: 8  
 Sequence Coverage: 11%

Matched peptides shown in Bold Red

```

1 MSETDHIAS TSSDKNVGKTP ELKEDSCNLF SGNESKLEN ESKLLSLNTD
51 KTLCPNEHN NRIEAQENYI PDHGGGEDSC AKTDTGSENS EQIANFPSPGN
101 FAKHISK TNE TEQKVTQILV ELRSSTFPES ANEKTYSESP YDTCCTKFKFI
151 SKIKSVSASE DLLEEIESEL LSTFAEHRV PNGMNGEHA LVLFEKCVQD
201 KYLQQEHIK KLIKENKKHQ ELFVVICSEK DNLREELKRR TETEKQHMNT
251 IKQLESRIEE LNKEVKASRD QLIAQDVTA NAVQQLHKEM AQRMEQANKK
301 CEEARQEKEA MVMKYVRGEK ESLDLRKEKE TLEKLRDAN KELEKNTNKI
351 KQLSQEKGR L HQLYETKEGE TTRLIREIDK LKEDINSHVI KVKWAQNKLK
401 AEMDSHKETK DKLKETTTKL TOAKEEADQI RKNCDMIKT YQSESEIKSN
451 ELDAKLRVTK GELEKQMQEK SDQLEMHHAK IKELEDLKR TFKEGMDELRT
501 LRTKVKCLE D ERLRTEDELS KYKEIINRQK AEIQNLLDKV KTADQLQEQL
551 QRKQEIENL KEEVESLNSL INDLQKDIEG SRKRESELLL FTERLTSKNA
601 QLQSESNLQ SQFDKVSCE SQLSQCEQM KQTNINLESR LLKEEELRKE
651 EVQTLQAELA CRQTEVKALS TQVEELKDEL VTQRRKHASS IKDLTKQLQQ
701 ARRLKLDQVES GSYDKEVSSM GSRSSSSGSL NARSSAEDRS PENTGSSVAV
751 DNFPQVDKAM LIERIVRLQK AHARKNEKIE FMEDHIKQLV EEIRKTKII
801 QSYILREESG TSSSEASDFN KVHLRRGGI MASLYTSHPA DNGLTLELSL
851 EINRRLQAVL EDTLLKNITL KENLQTLGTE IERLIKHQHE LEQRTKKT
  
```

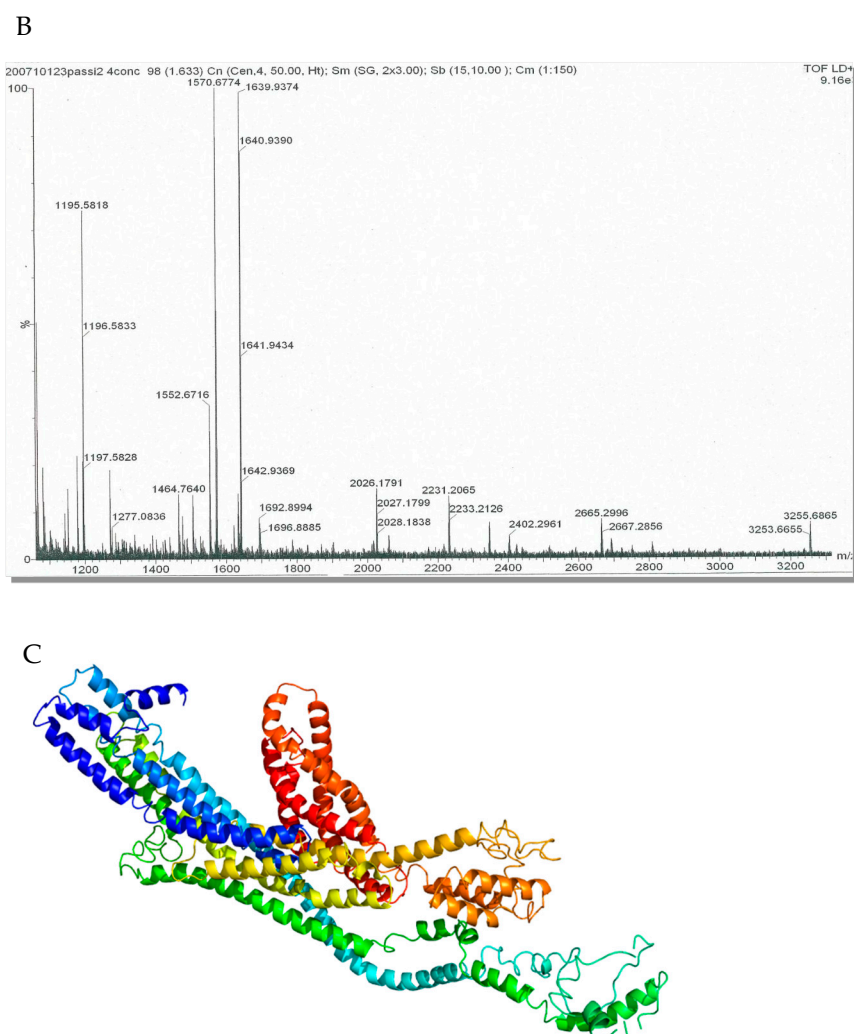

**Figure S1.** (A) MALDI-TOF spectrum of peptides obtained from SDS-PAGE band excised and analysed as reported in Materials and Methods. (B) MASCOT Search results of the peptides matching the human uncharacterized protein c10orf118. (C) Prediction of the protein 3D-structure by Phyre2 program, showing the presence of many alpha-helix as secondary structures.

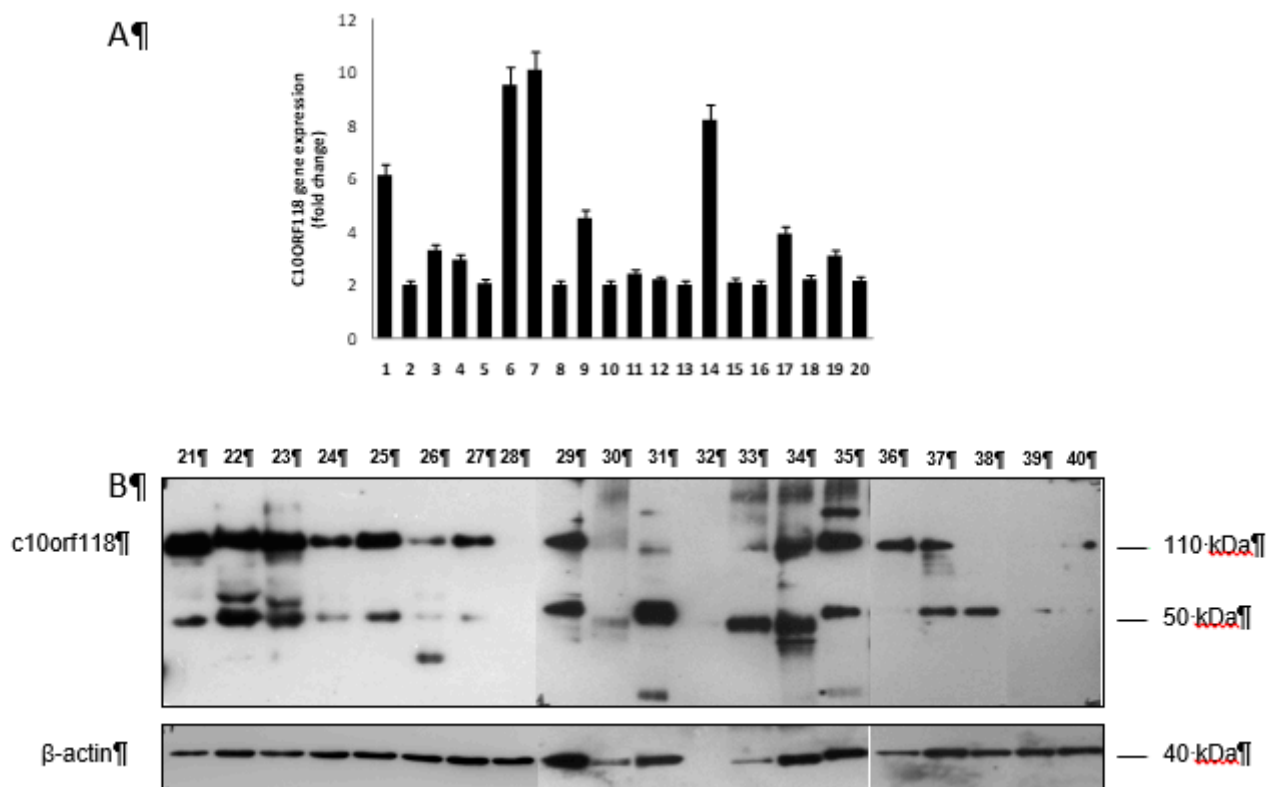

**Figure S2.** A. RT-PCR analysis of the c10orf118 gene expression in 20 tissue specimens from breast cancer patients; B. western blot analysis of the c10orf118 protein expression in 20 tissue specimens from breast cancer patients.

**Table S1.** Information of different gene variants and protein isoforms of c10orf118, according to Ensembl bioinformatics program.

| Name        | Transcript ID   | bp   | Protein    | Translation ID  | Biotype              |
|-------------|-----------------|------|------------|-----------------|----------------------|
| CCDC186-006 | ENST00000369287 | 7245 | 898aa      | ENSP00000358293 | Protein coding       |
| CCDC186-003 | ENST00000369285 | 2035 | 211aa      | ENSP00000358291 | Protein coding       |
| CCDC186-002 | ENST00000369286 | 1928 | 211aa      | ENSP00000358292 | Protein coding       |
| CCDC186-001 | ENST00000428953 | 1576 | 436aa      | ENSP00000415344 | Protein coding       |
| CCDC186-004 | ENST00000497592 | 661  | No protein | -               | Processed transcript |
| CCDC186-005 | ENST00000490661 | 477  | No protein | -               | Retained intron      |

**Table S2.** Cellular localization of c10orf118 predicted by ComPPI computational program (<http://comppi.linkgroup.hu/>).

| Major Localization | Minor Localization           | Localization Score | Experiment Type                                  | Source Database         |
|--------------------|------------------------------|--------------------|--------------------------------------------------|-------------------------|
| Cytosol            | Cytoplasm (GO:0005737)       | 0.91               | Predicted: pTarget method                        | LOCATE                  |
| Cytosol            | Cytoplasm (GO:0005737)       | 0.91               | Predicted: PAML algorithm                        | PA-GOSUB                |
| Nucleus            | Nucleus (GO:0005634)         | 0.7                | Predicted: SVM decision tree                     | eSLDB                   |
| Secretory-pathway  | Golgi apparatus (GO:0005794) | 0.94               | Predicted: PAML algorithm                        | PA-GOSUB                |
| Secretory-pathway  | Golgi apparatus (GO:0005794) | 0.94               | Experimental: annotated protein expression (APE) | The Human Protein Atlas |
